# Supplementary material
Source: Springer Nature journal article supplement (https://www.springermedizin.de/resource/supplementary/12955_2010_706_MOESM2_ESM.pdf/9561146)

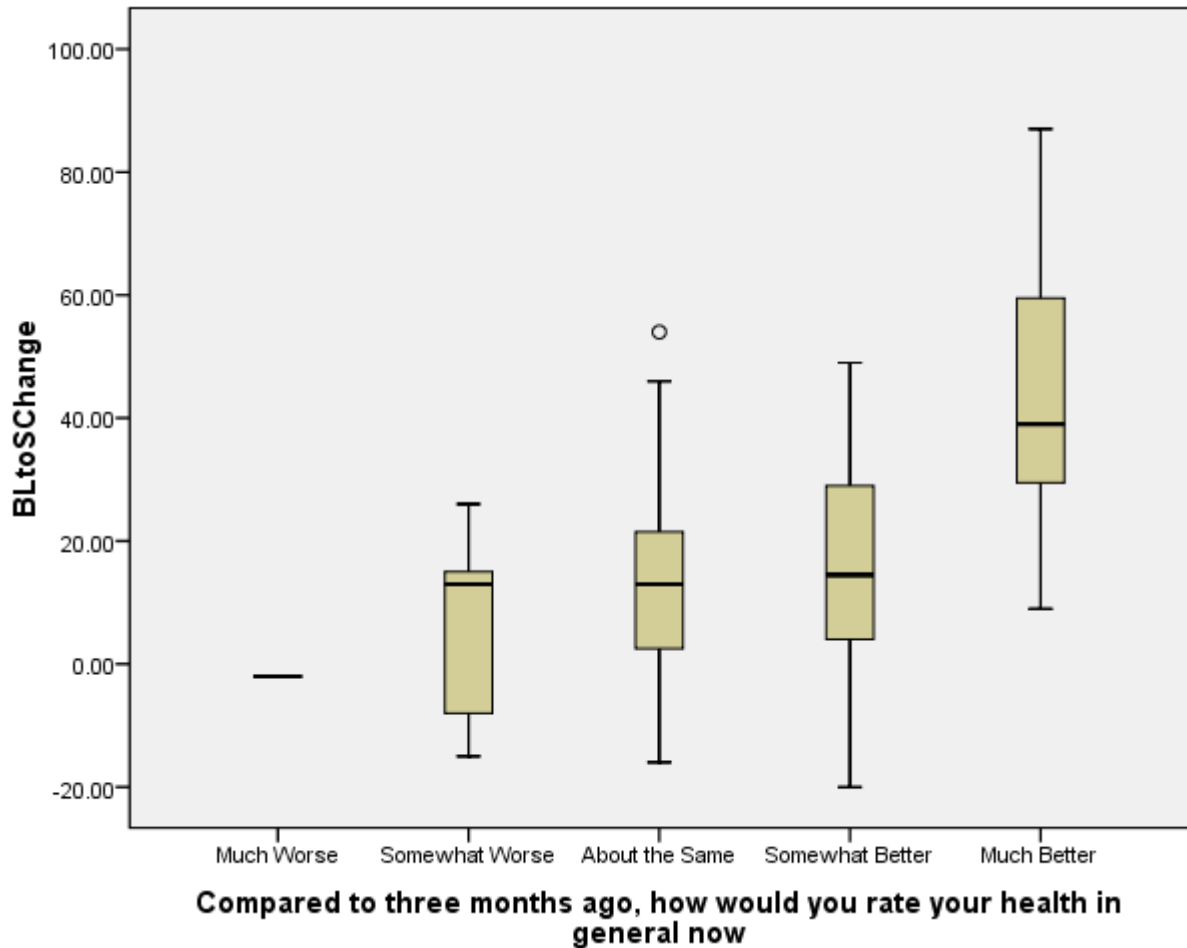

Ns by group= 1,9,28,30,15

Supplement: MOESM2 [file 9561146]
